# Supplementary material for: Polystyrene Nanoplastics Induce Lung Injury via Activating Oxidative Stress: Molecular Insights from Bioinformatics Analysis
Source: MDPI journal article supplement (doi:10.3390/nano12193507), 2022-10-07
Supplement: s1 [file s1]

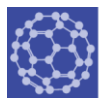

## Supplementary Materials

# Polystyrene Nanoplastics Induce Lung Injury via Activating Oxidative Stress: Molecular Insights from Bioinformatics Analysis

Tianyi Zhang, Sheng Yang, Yiling Ge, Xin Wan, Yuxin Zhu, Jie Li, Lihong Yin, Yuepu Pu and Geyu Liang \*

Key Laboratory of Environmental Medicine Engineering, School of Public Health, Southeast University, Ministry of Education, Nanjing 210009, China

\* Correspondence: lianggeyu@163.com; Tel.: +86-25-83272572; Fax: +86-25-83324322.

**This PDF file includes:**

Figures S1–S2 and Table S2

Table S1 was uploaded separately due to the scale of the data.

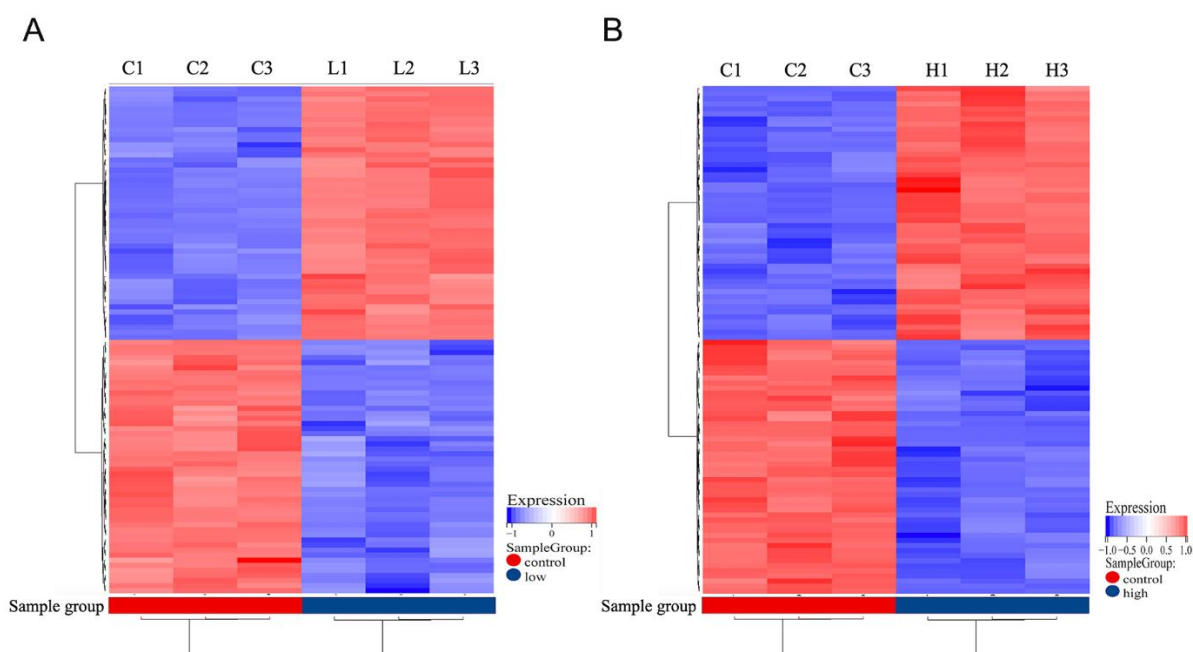

**Figure S1.** Heatmaps of DEGs in BEAS-2B cells after PS-NPs exposure of diverse concentrations compared with the control group. (A) low dose group vs control group. (B) high dose group vs control group.

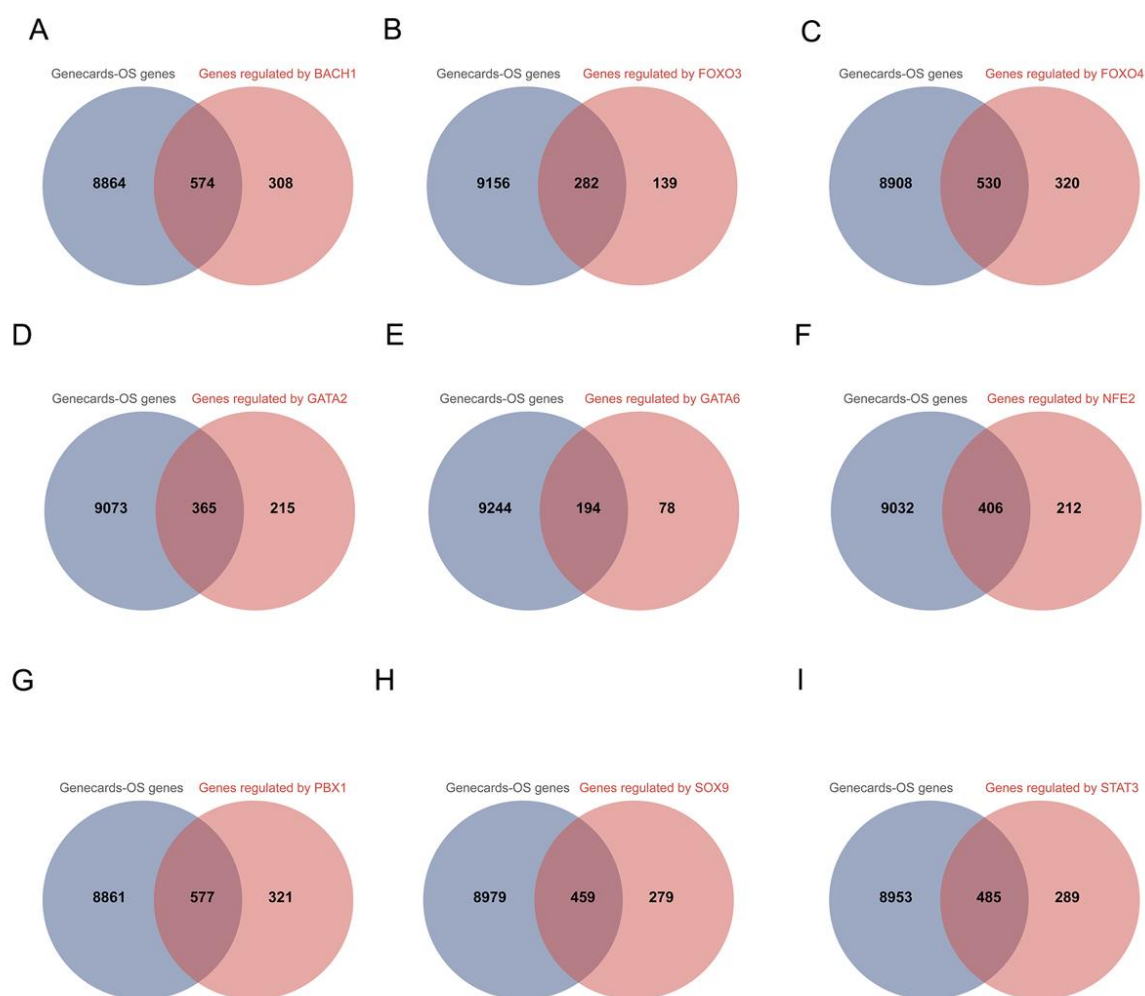

**Figure S2.** (A–I) The DEGs related to oxidative stress that regulated by BACH1 (A), FOXO3 (B), FOXO4 (C), GATA2 (D), GATA6 (E), NFE2 (F), PBX1 (G), SOX9 (H) and STAT3 (I). “OS” represents oxidative stress.

**Table S2.** The primer sequences for qPCR.

| <b>Gene Symbol</b> | <b>Forward Sequence (5' to 3')</b> | <b>Reverse Sequence (5' to 3')</b> |
|--------------------|------------------------------------|------------------------------------|
| Bach1              | CTCAGCCTTAATGACCAGCGG              | GCCTACGATTCTTGAGTGGAAG             |
| Gata2              | ACTGACGGAGAGCATGAAGAT              | CCGGCACATAGGAGGGGTA                |
| Gata6              | CTCAGTTCCTACGCTTCGCAT              | GTCGAGGTCAGTGAACAGCA               |
| Sox9               | AGCGAACGCACATCAAGAC                | CTGTAGGCGATCTGTTGGGG               |
| Pbx1               | GACAACCTCAGTGGAGCATTCA             | CTCTCGCAGGAGATTCATCAC              |
| Nfe2               | CGGCGCAGCGAATATGTAGA               | CCGACGTTTCATCCCGACTC               |
| Foxo3              | CGGACAAACGGCTCACTCT                | CGGATCGAGTTCTTCCATCCTG             |
| Foxo4              | CCGGAGAAGCGACTGACAC                | CCTTCGAGGAGCAGAGTGCG               |
| Tnfrsf12a          | GGGTGCCCTCCTTCCTA                  | GCCAGCCCTCCTAGTGG                  |
| Gapdh              | CCTGTTCCAGAGACAGCCGC               | GCGCCCAATACGGCCAAATC               |
